# Supplementary material for: Enhancing visible light photocatalytic activity of BiOBr/rod-like BiPO4 through a heterojunction by a two-step method
Source: Royal Society of Chemistry journal article supplement (doi:10.1039/c5ra08421k), 2015-01-01
Supplement: c5ra08421k1.pdf [file c5ra08421k1.pdf]

## Enhancing visible light photocatalytic activity of BiOBr/rod-like BiPO<sub>4</sub> through heterojunction by a two-step method

College of Chemical Engineering, Inner Mongolia University of Technology, Hohhot 010051, China. E-mail: [czz03@163.com](mailto:czz03@163.com)

\*Corresponding author: [czz03@163.com](mailto:czz03@163.com); Fax: +86 471 6503298; Tel: +86 471 6575722; Tel./Fax: +86 579 8228226

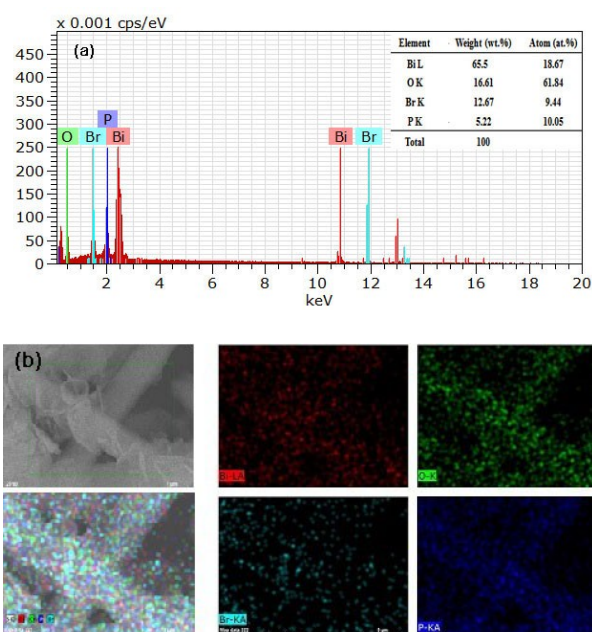

S1. (a) EDS and (b) FESEM elemental mapping results of 50% BiOBr/BiPO<sub>4</sub>.

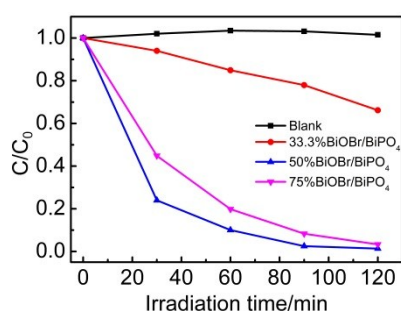

S2. Photocatalytic degradation of RhB for BiOBr/BiPO<sub>4</sub> composites with different molar ratio under visible light irradiation.

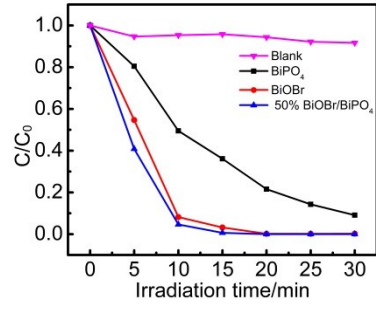

S3. Photocatalytic degradation of RhB for BiPO<sub>4</sub>, BiOBr and 50% BiOBr/BiPO<sub>4</sub> under UV light irradiation.

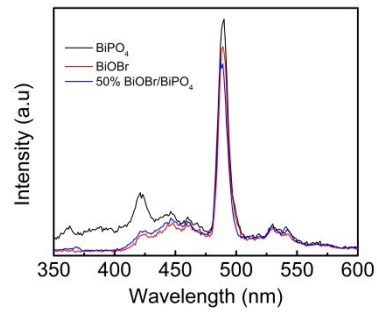

S4. PL spectra of BiPO<sub>4</sub>, BiOBr and 50% BiOBr/BiPO<sub>4</sub>.
